# Supplementary material for: Triorganotin carboxylates – synthesis and crystal structure of 2-methyl-1 H -imidazol-3-ium catena-O , O ′-oxalatotriphenylstannate
Source: publisher site journal article supplement (doi:10.1515/mgmc-2016-0016), 2016-06-29
Supplement: Supplementary file 1 [file mgmc-2016-0016_Suppl.docx]

Triorganotin carboxylates − **Synthesis and crystal structure of 2-methyl-1*H*-imidazol-3-ium *catena-O,O’*-oxalatotriphenylstannate**

Mouhamadou Birame Diop, Libasse Diop, Laurent Plasseraud, and Hélène Cattey

**Supplementary information**

**
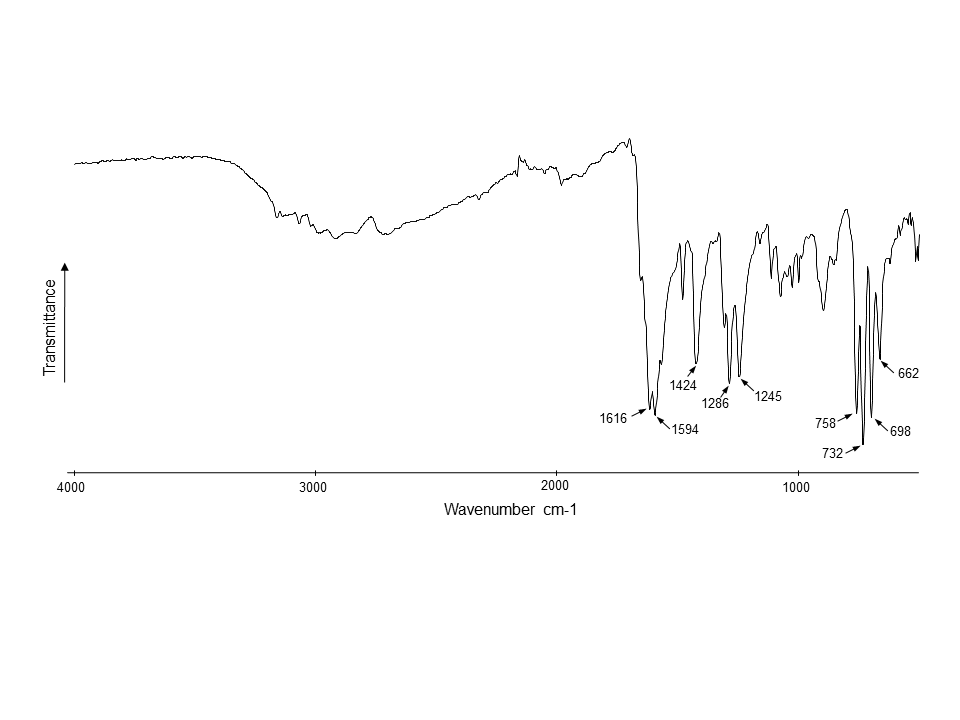
**

**Figure S1**  Infrared spectrum (ATR) of **1**.

**
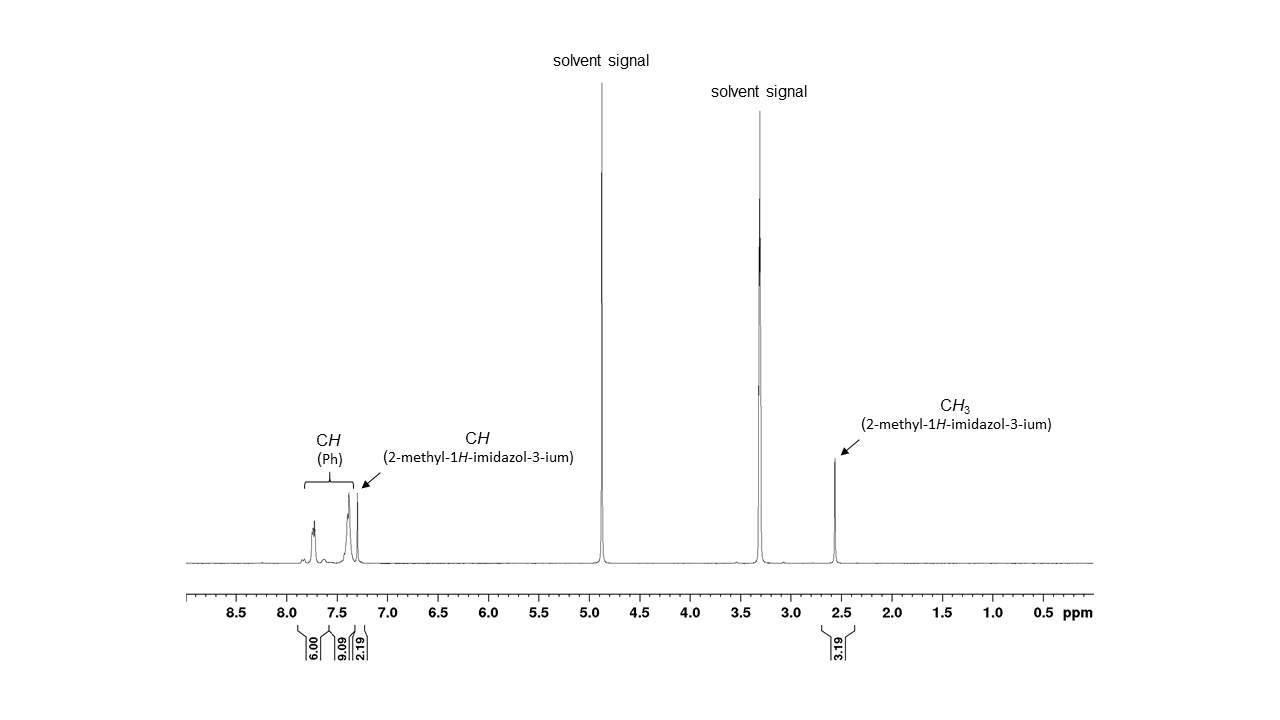
**

**Figure S2**  1H NMR spectrum of **1** (CD3OD, 300 K).
